# Supplementary material for: Fast and ratiometric “naked eye” detection of hydrazine for both solid and vapour phase sensing
Source: Royal Society of Chemistry journal article supplement (doi:10.1039/c4nj02220c), 2015-01-01
Supplement: c4nj02220c1.pdf [file c4nj02220c1.pdf]

## Supporting Information

### **Fast and ratiometric “ Naked eye” detection of hydrazine both solid and vapour phase sensing**

**Shyamaprosad Goswami\*, Sima Paul and Abhishek Manna**

Department of Chemistry, Indian Institute of Engineering Science and Technology, Shibpur, (Formerly Bengal Engineering and Science University, Shibpur), Howrah-711103, West Bengal, India.

e-mail address: [spgoswamical@yahoo.com](mailto:spgoswamical@yahoo.com)

### CONTENTS

|                                                                                         |              |
|-----------------------------------------------------------------------------------------|--------------|
| <b>1. Bar Diagram of PBF in presence of some amine containing compounds.....</b>        | <b>2</b>     |
| <b>2. Fluorescence intensity vs conc. of hydrazine plot.....</b>                        | <b>2</b>     |
| <b>3. Calculation of the detection limit.....</b>                                       | <b>3</b>     |
| <b>4. Calculation of rate constant.....</b>                                             | <b>3</b>     |
| <b>5. <sup>1</sup>H-NMR, <sup>13</sup>C-NMR and Mass spectra.....</b>                   | <b>4-5</b>   |
| <b>6. UV-vis spectra of receptor with different guest cations and anions.....</b>       | <b>6-8</b>   |
| <b>7. Fluorescence spectra of receptor with different guest cations and anions.....</b> | <b>9-10</b>  |
| <b>8. Fluorescence spectra of receptor with different amines.....</b>                   | <b>11-13</b> |
| <b>9. References.....</b>                                                               | <b>13</b>    |

## 1. Bar Diagram of PBF towards different amine containing compound in UV-vis and fluorescence titration methods:

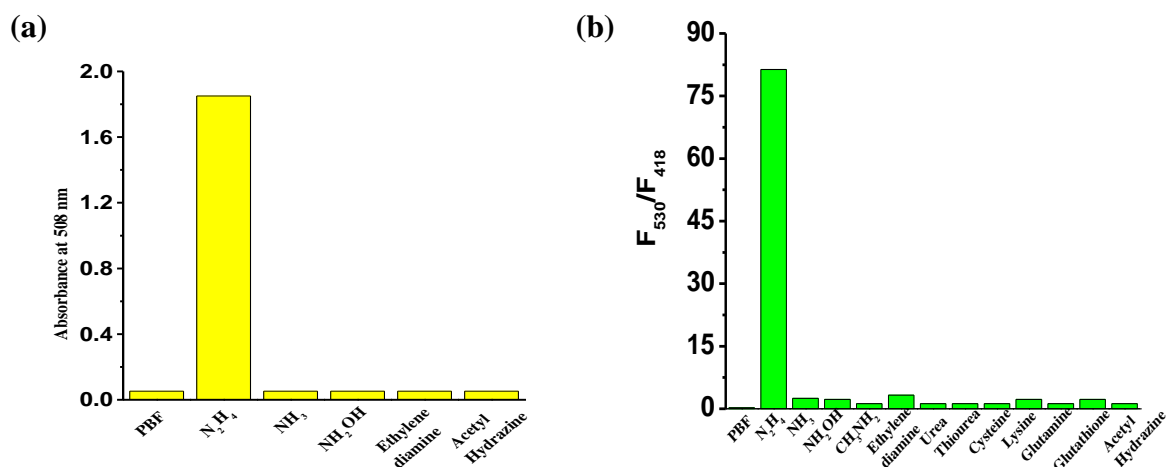

**Figure S1:** (a) Relative absorbance of the PBF in presence of other amine containing compounds (b) Bar chart illustrating fluorescence response of free ligand and two equivalent of other amine containing compounds in  $CH_3CN-H_2O$  (6:4, v/v, 25 ° C) .

## 2. Fluorescence intensity vs conc. of hydrazine plot:

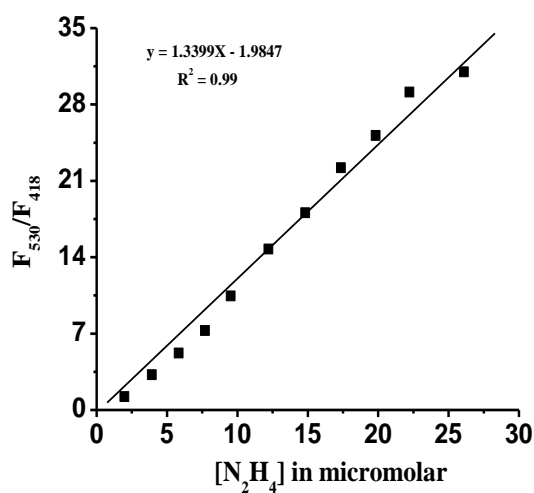

**Figure S2:** Fluorescence intensity ratio changes ( $F_{530}/F_{418}$ ) of PBF upon gradual addition of hydrazine.

### 3. Calculation of the detection limit:

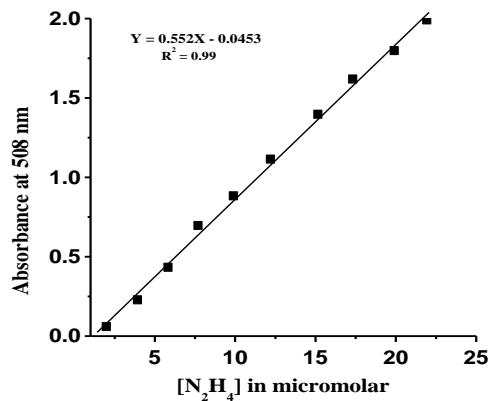

The detection limit DL of **PBF** for hydrazine was determined from the following equation<sup>1</sup>:

$$DL = K * Sb1/S$$

Where K = 2 or 3 (we take 2 in this case); Sb1 is the standard deviation of the blank solution; S is the slope of the calibration curve.

From the graph we get slope = 0.552, and Sb1 value is 0.113009.

Thus using the formula we get the Detection Limit = 0.41  $\mu$ M i.e. PBF can detect hydrazine in this minimum concentration.

### 4. Calculation of rate constant:

From the time vs. Fl. Intensity vs. time (sec.) plot at fixed wavelength ( 530nm) using first order rate equation (Figure 5), we get rate constant  $K = \text{slope} \times 2.303 = 0.067 \times 2.303 = 15.43 \times 10^{-2} \text{ sec}^{-1}$

## 5. $^1\text{H}$ NMR, $^{13}\text{C}$ NMR and HR MS spectra of PBF and corresponding hydrazone product:

### $^1\text{H}$ NMR spectrum of Receptor i.e. PBF:

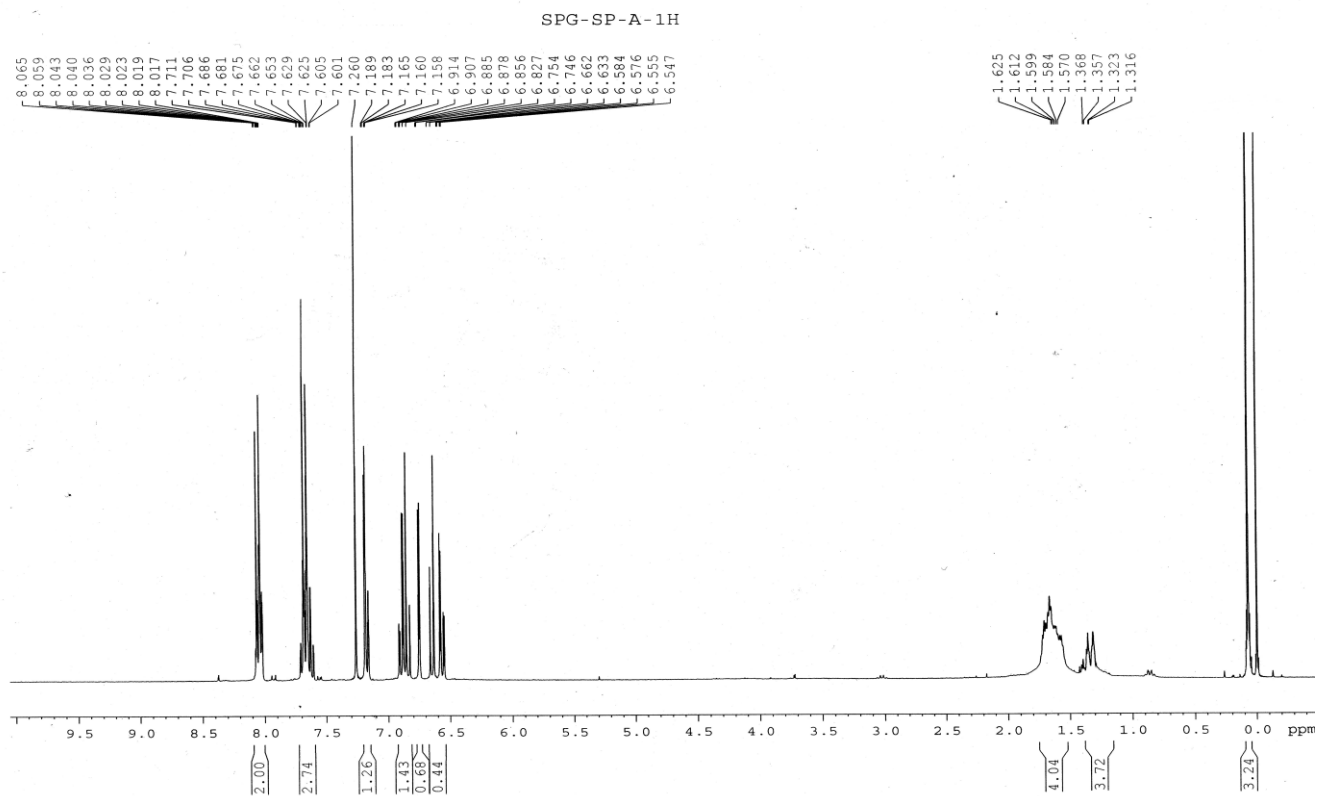

### $^{13}\text{C}$ NMR spectrum of PBF:

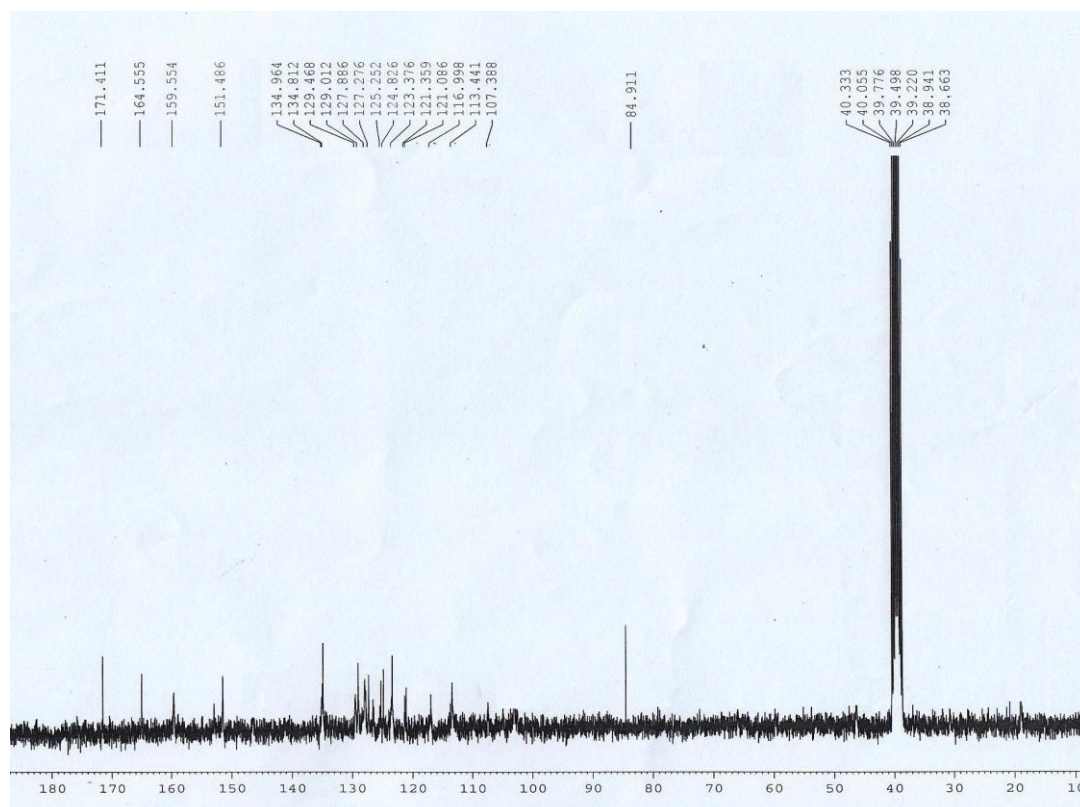

## HR MS Mass Spectra of PBF:

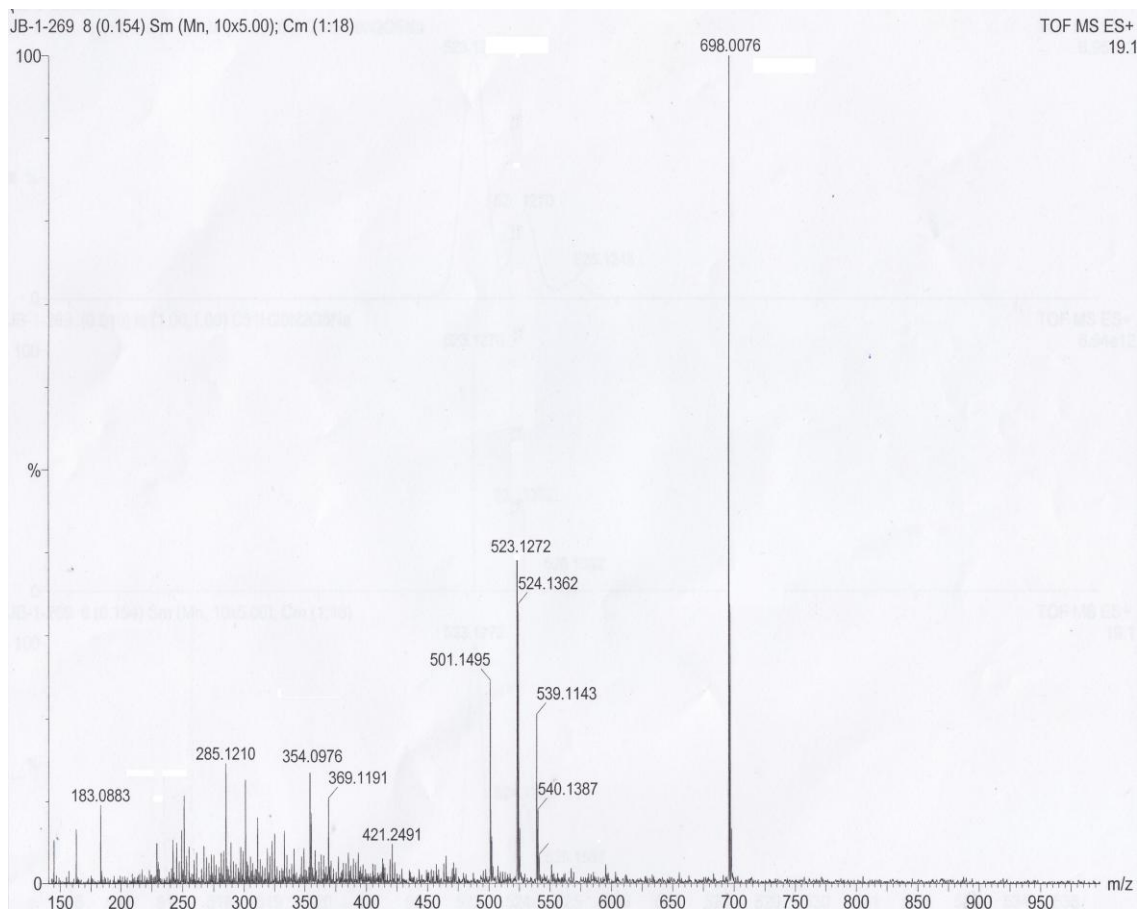

## $^1\text{H}$ NMR spectrum of Hydrazone product i.e. PBF + Hyd:

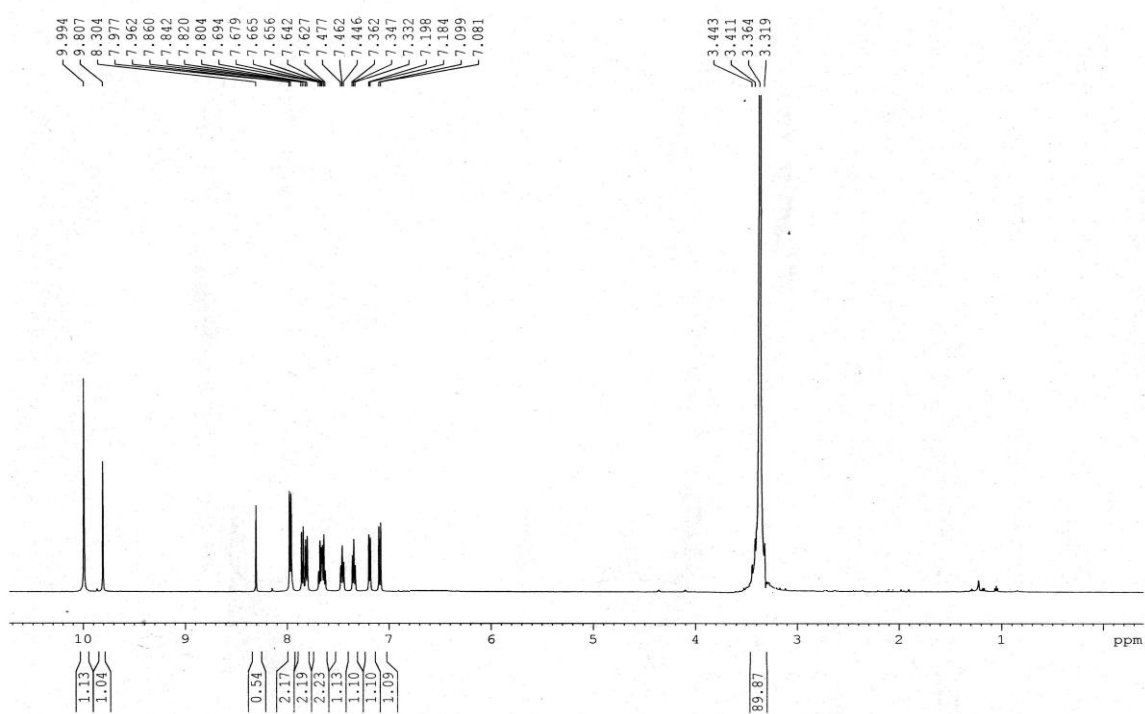

## HR MS Spectra of PBF+ Hyd:

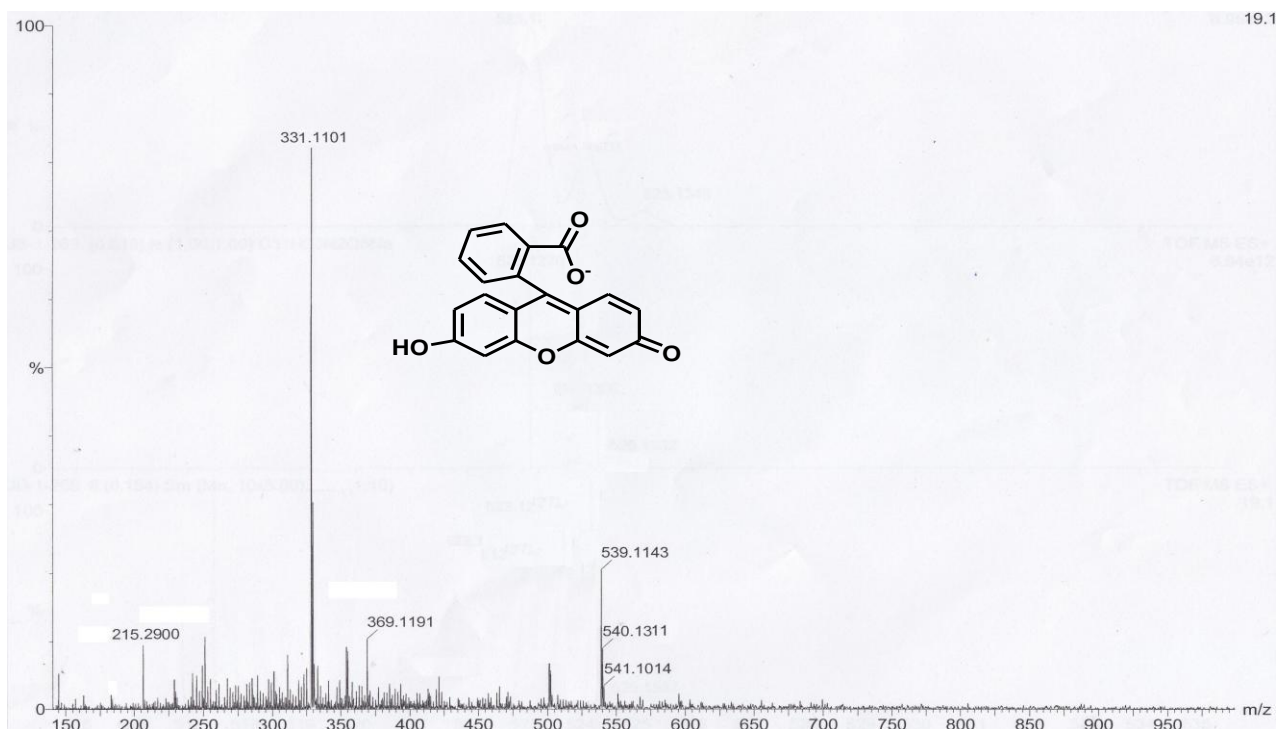

**6. UV-vis absorption spectra of PBF with different cations as  $\text{Ag}^+$ ,  $\text{Cd}^{2+}$ ,  $\text{Co}^{2+}$ ,  $\text{Cu}^{2+}$ ,  $\text{Fe}^{3+}$ ,  $\text{Mn}^{2+}$ ,  $\text{Pd}^{2+}$  (The solutions of metal ions were prepared from  $\text{AgNO}_3$ ,  $\text{Cd}(\text{ClO}_4)_2 \cdot \text{H}_2\text{O}$ ,  $\text{Co}(\text{ClO}_4)_2 \cdot 6\text{H}_2\text{O}$ ,  $\text{Cu}(\text{ClO}_4)_2 \cdot 6\text{H}_2\text{O}$ ,  $\text{FeCl}_3$ ,  $\text{MnCl}_2$ ,  $\text{Pb}(\text{ClO}_4)_2$ ,  $\text{Zn}(\text{ClO}_4)_2 \cdot 6\text{H}_2\text{O}$ , and  $\text{NaClO}_4$ , respectively in  $\text{CH}_3\text{CN}-\text{H}_2\text{O}$ ), different anions  $\text{Cl}^-$ ,  $\text{Br}^-$ ,  $\text{I}^-$  as their tetra butyl salt and  $\text{SO}_4^{2-}$ ,  $\text{SO}_3^{2-}$ ,  $\text{ClO}_4^-$ ,  $\text{HPO}_4^-$  as their sodium salt in  $\text{CH}_3\text{CN} : \text{H}_2\text{O}$  (6:4, v/v).**

(a)

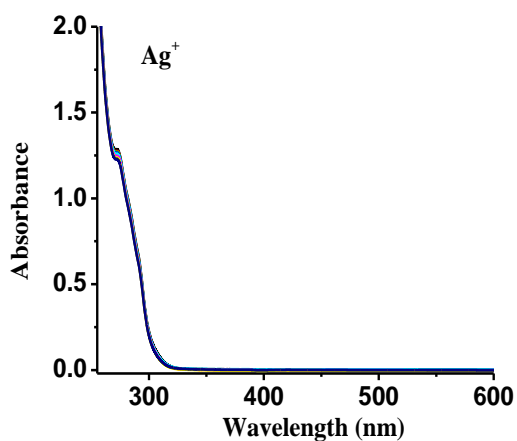

(b)

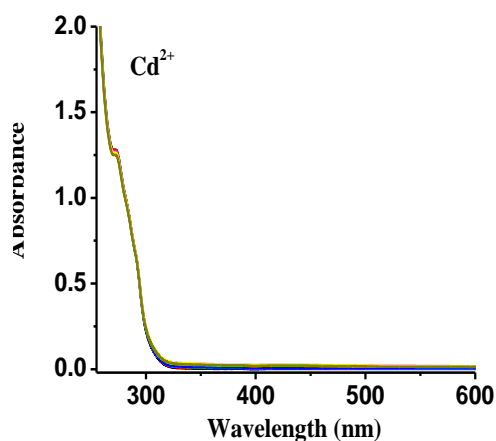

(c)

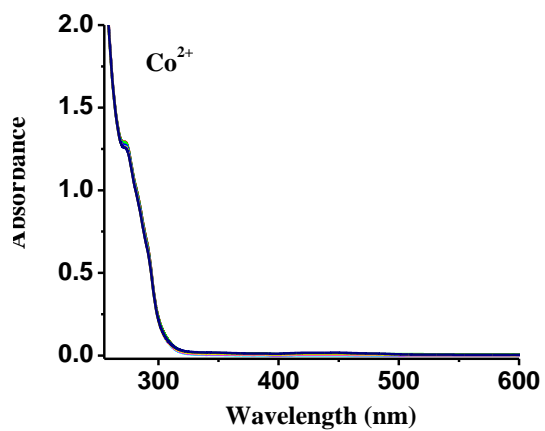

(d)

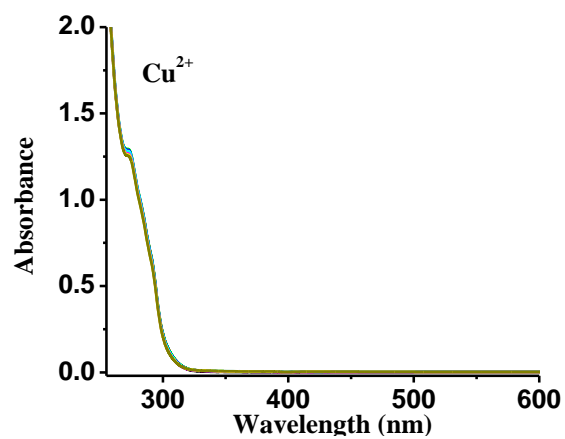

(e)

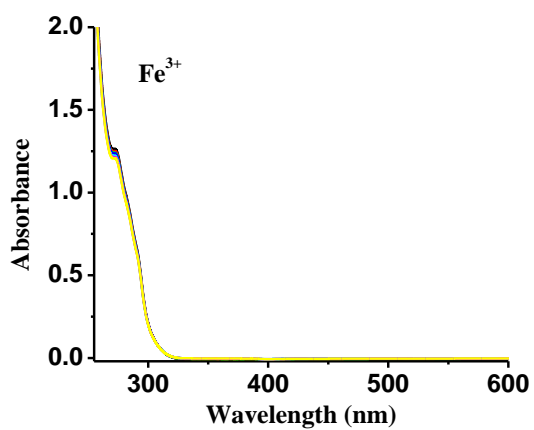

(f)

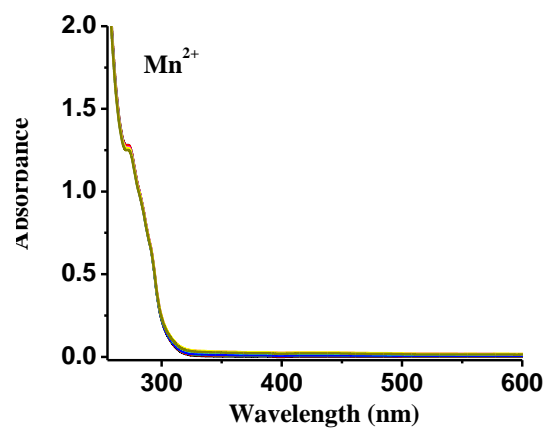

(g)

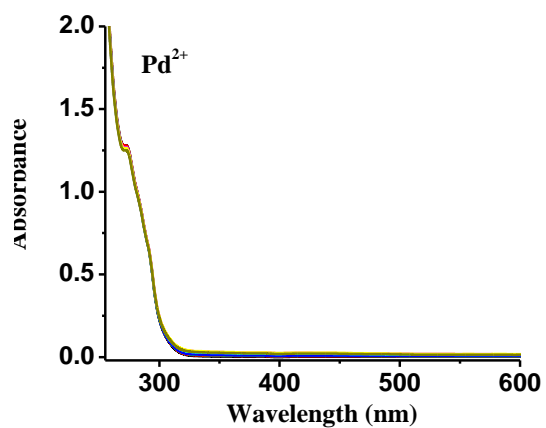

(h)

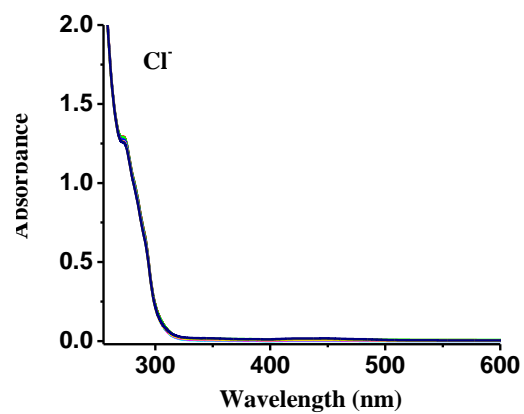

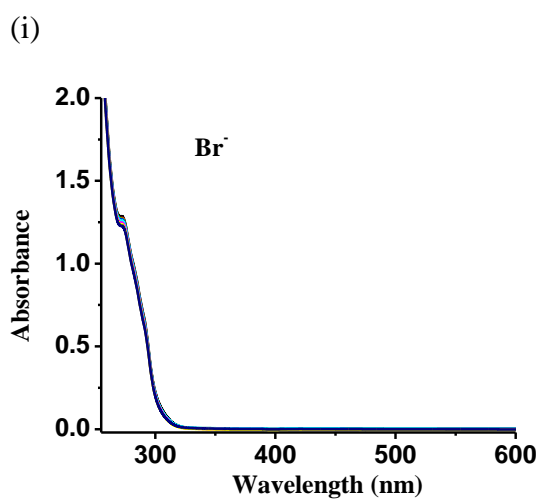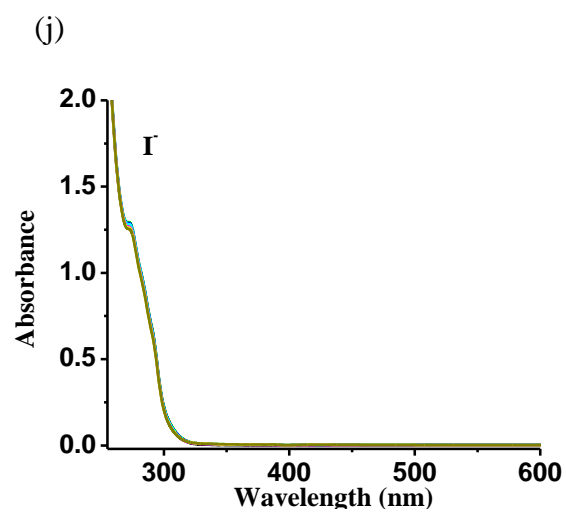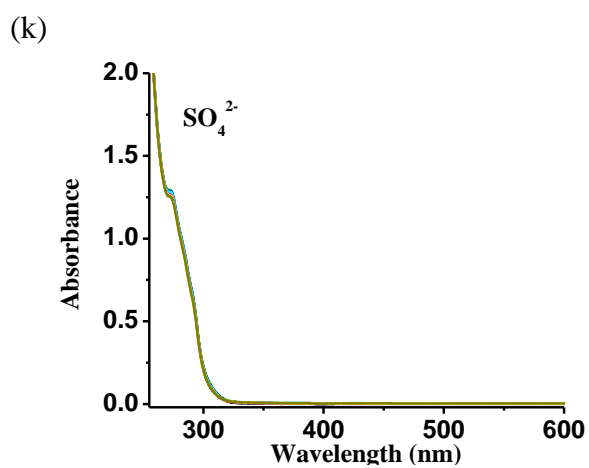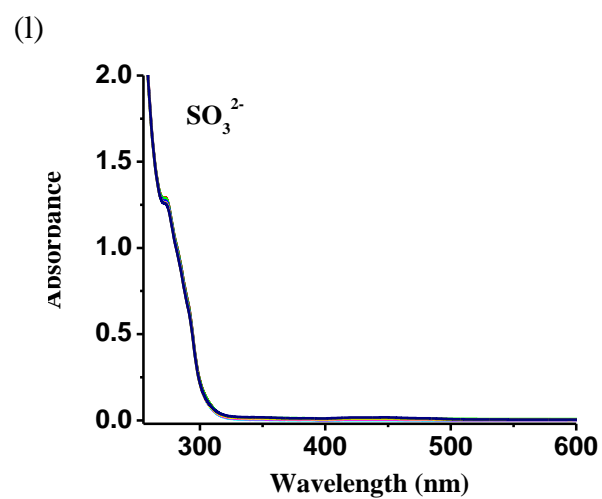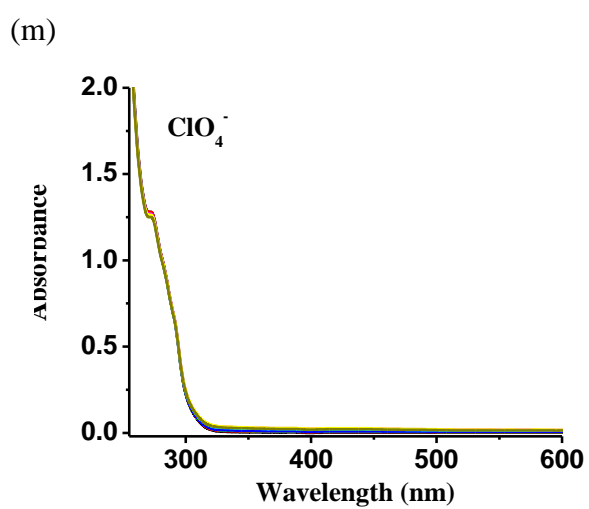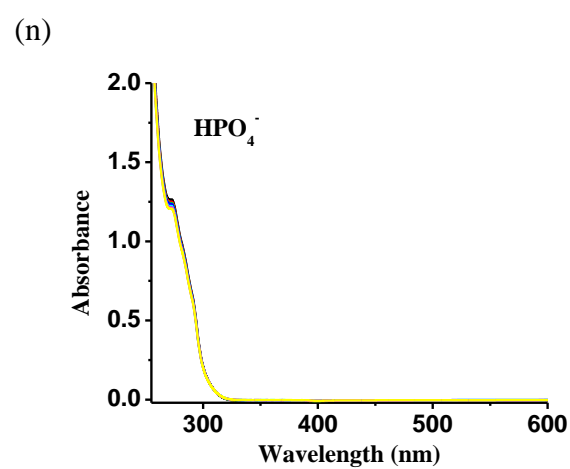



7. Fluorescence emission spectra of PBF with different cations as  $\text{Ag}^+$ ,  $\text{Cd}^{2+}$ ,  $\text{Co}^{2+}$ ,  $\text{Cu}^{2+}$ ,  $\text{Fe}^{3+}$ ,  $\text{Mn}^{2+}$ ,  $\text{Pb}^{2+}$ ,  $\text{Zn}^{2+}$ ,  $\text{Na}^+$  (The solutions of metal ions were prepared from  $\text{AgNO}_3$ ,  $\text{Cd}(\text{ClO}_4)_2 \cdot \text{H}_2\text{O}$ ,  $\text{Co}(\text{ClO}_4)_2 \cdot 6\text{H}_2\text{O}$ ,  $\text{Cu}(\text{ClO}_4)_2 \cdot 6\text{H}_2\text{O}$ ,  $\text{FeCl}_3$ ,  $\text{MnCl}_2$ ,  $\text{Pb}(\text{ClO}_4)_2$ ,  $\text{Zn}(\text{ClO}_4)_2 \cdot 6\text{H}_2\text{O}$ , and  $\text{NaClO}_4$ , respectively in  $\text{CH}_3\text{CN}-\text{H}_2\text{O}$ ), different anions  $\text{Cl}^-$ ,  $\text{Br}^-$ ,  $\text{I}^-$  as their tetra butyl salt and  $\text{ClO}_4^-$ ,  $\text{HPO}_4^{2-}$ ,  $\text{SO}_3^{2-}$ ,  $\text{SO}_4^{2-}$  as their sodium salt in  $\text{CH}_3\text{CN} : \text{H}_2\text{O}$  (8:2, v/v).

(a)

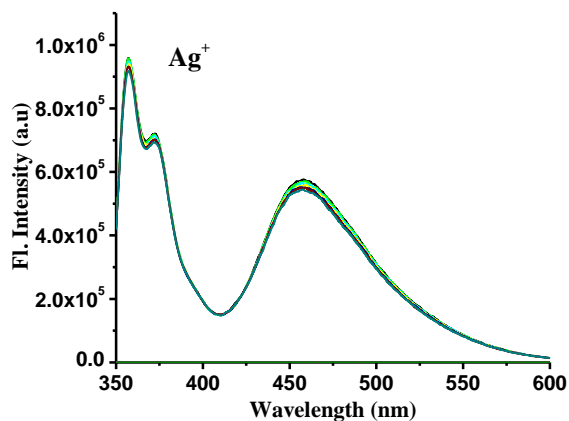

(b)

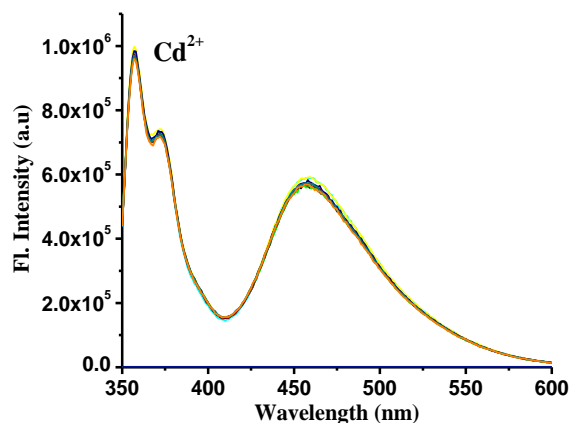

(c)

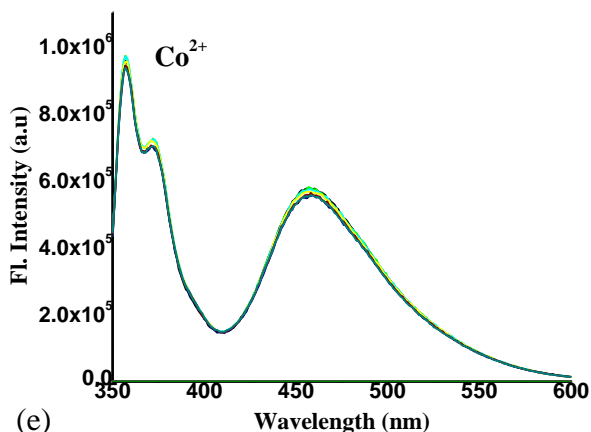

(d)

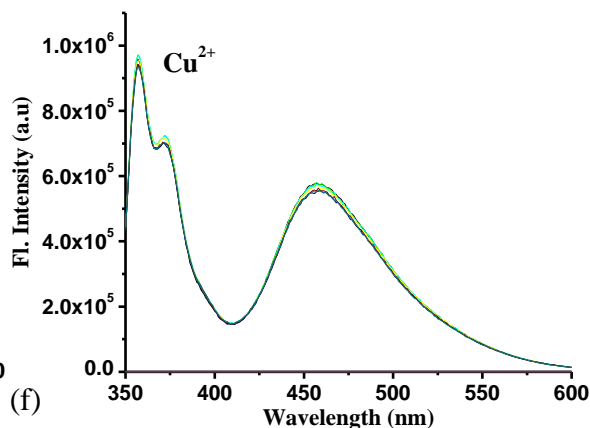

(e)

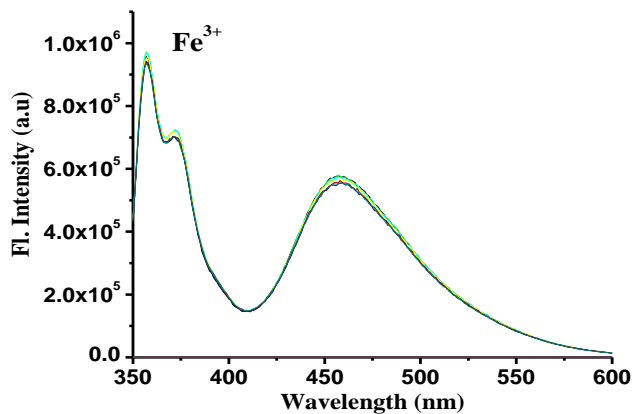

(f)

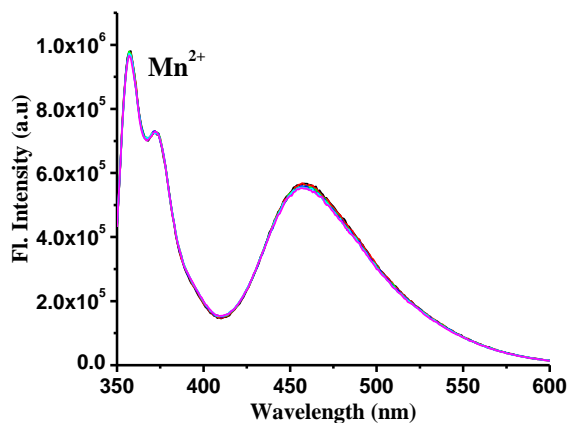

(g)

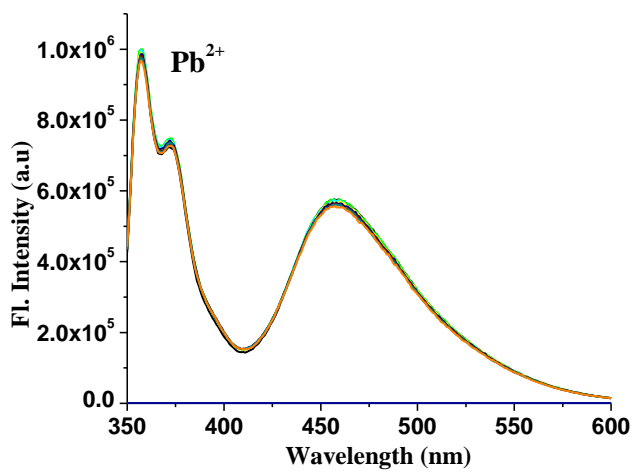

(h)

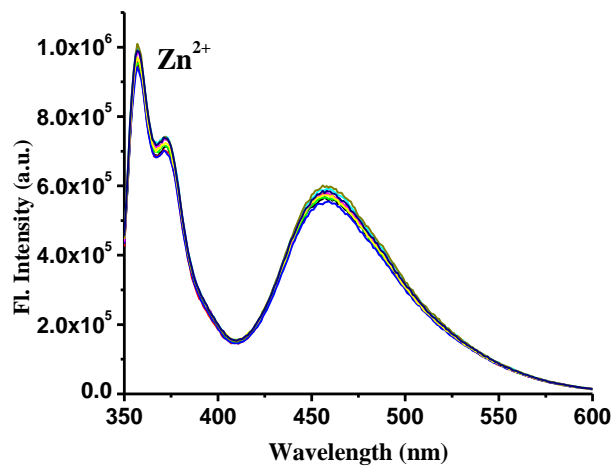

(i)

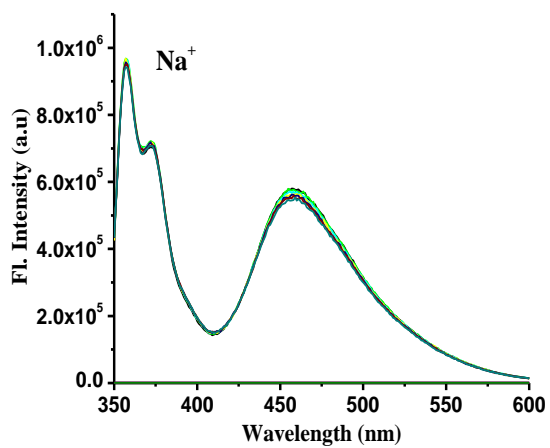

(j)

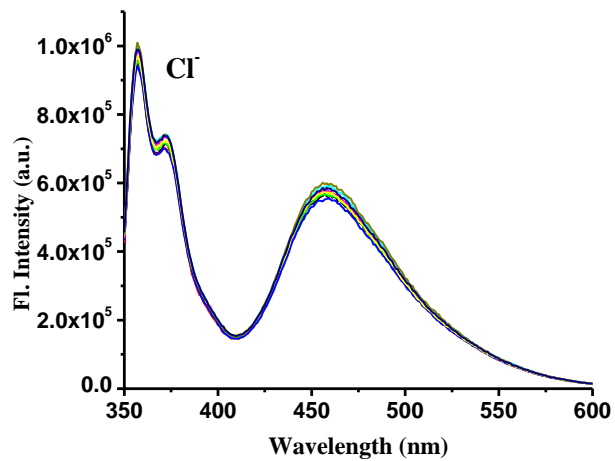

(k)

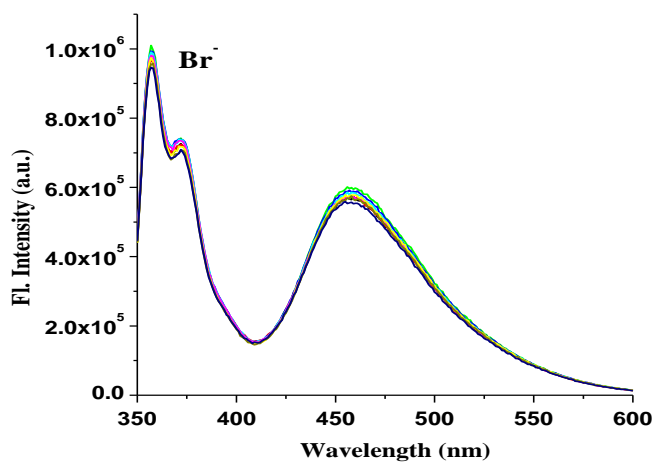

(l)

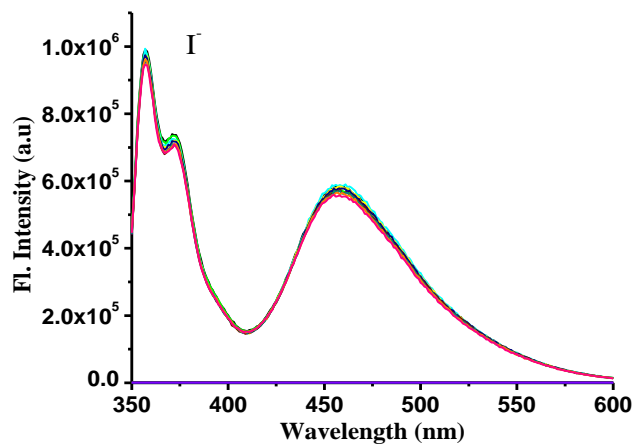

(m)

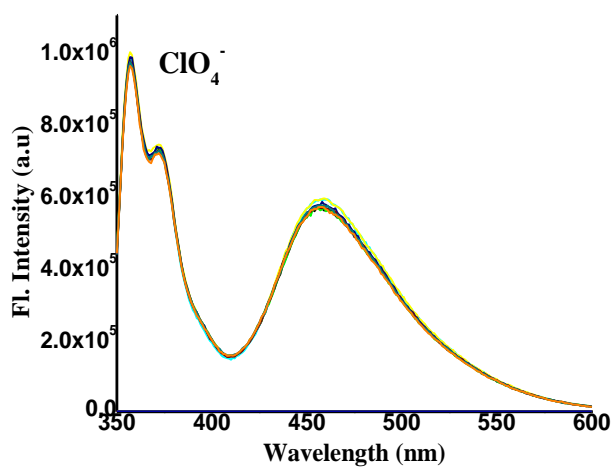

(n)

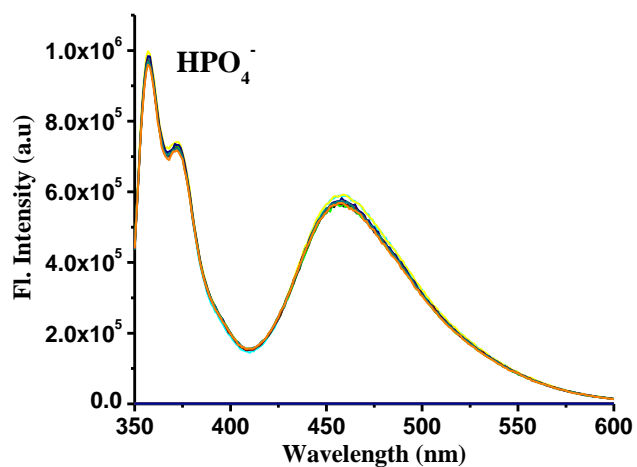

(o)

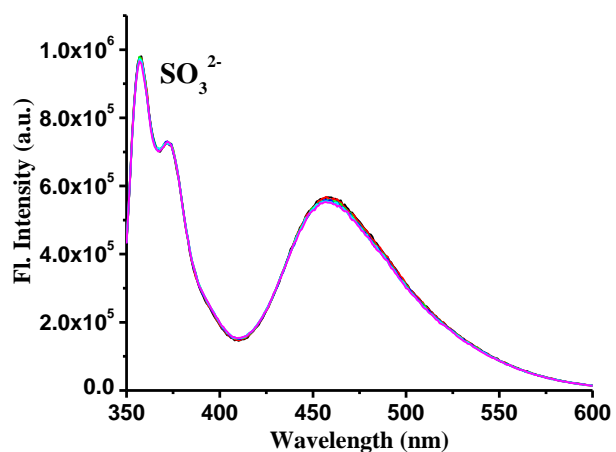

(p)

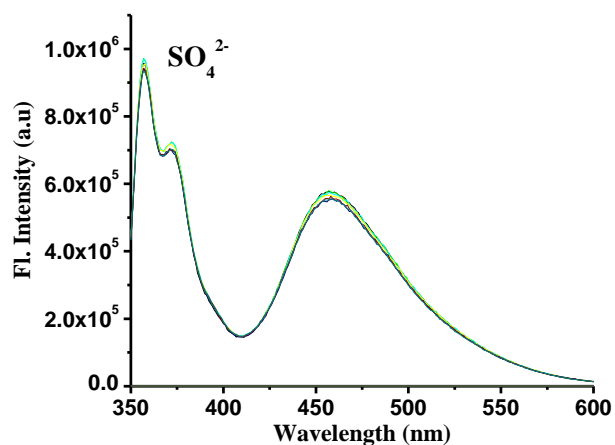

## 8. Fluorescence emission spectra of PBF with different amines

(a)

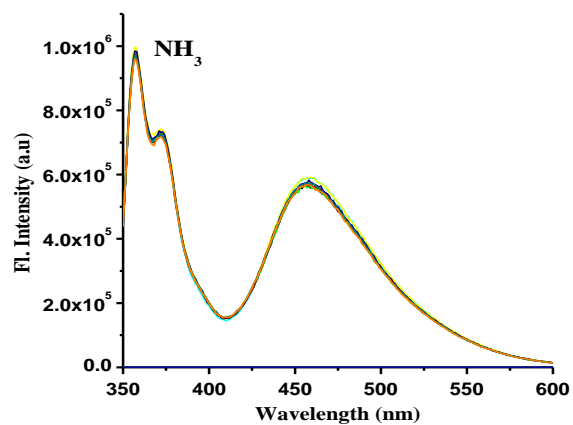

(b)

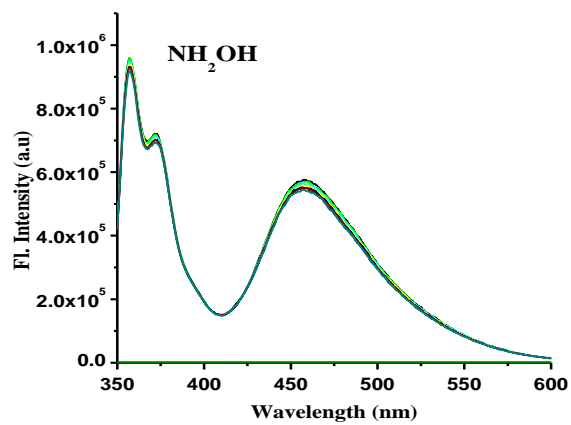

(c)

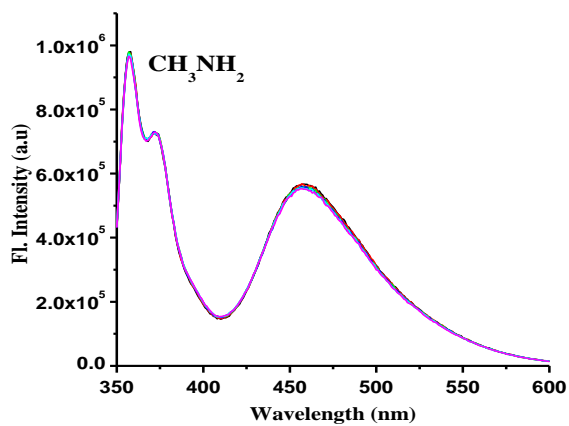

(d)

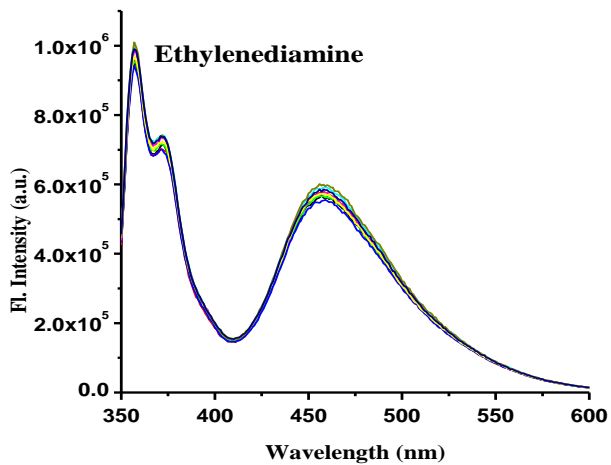

(e)

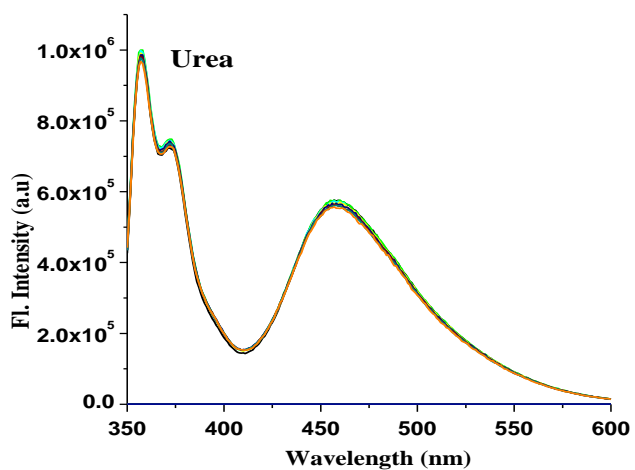

(f)

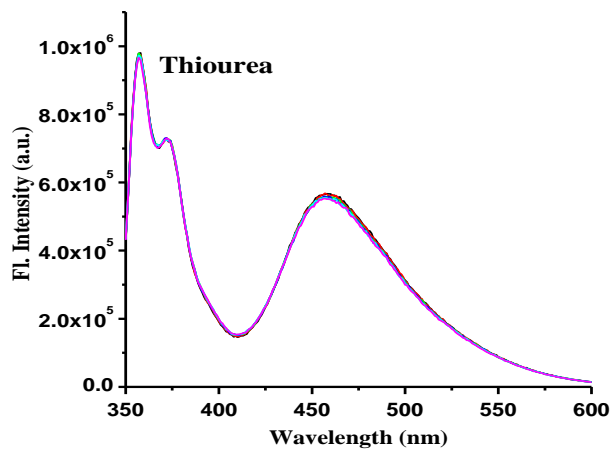

(g)

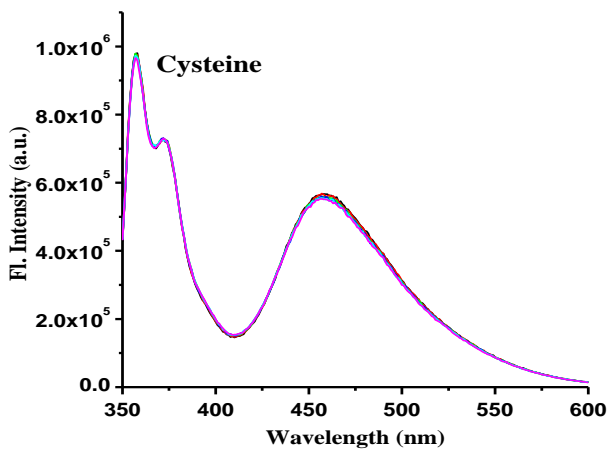

(h)

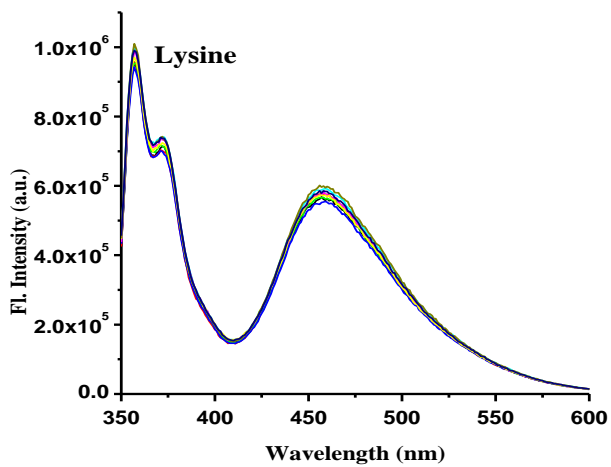

(i)

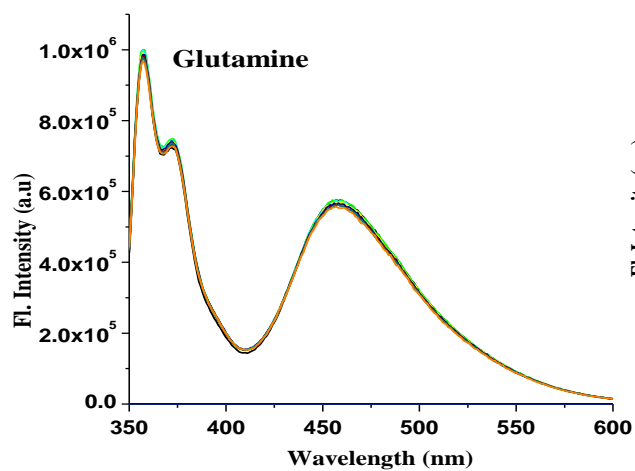

(j)

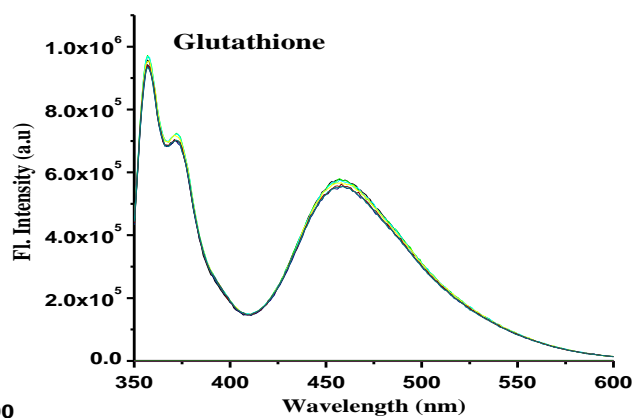

## 9. References:

1. M. Zhu, M. Yuan, X. Liu, J. Xu, J. Lv, C. Huang, H. Liu, Y. Li, S. Wang, D. Zhu, *Org. Lett.* 2008, **10**, 1481-1484
